# Supplementary material for: Estimation of the Relative Contribution of Postprandial Glucose Exposure to Average Total Glucose Exposure in Subjects with Type 2 Diabetes
Source: Hindawi journal article supplement (doi:10.1155/2016/3452898), 2016-01-01
Supplement: f1 [file 3452898.f1.pdf]

## Supporting information

TABLE S1: Sample size in clinical studies from vildagliptin clinical trial programme, monotherapy and vildagliptin plus metformin.

| Study | Vildagliptin 50 mg<br>qd/bid | Vildagliptin 50 mg +<br>metformin |
|-------|------------------------------|-----------------------------------|
|       | (n=2523)                     | (n=2752)                          |
| 1     | 5                            | -                                 |
| 2     | 200                          | -                                 |
| 3     | 135                          | -                                 |
| 4     | 436                          | -                                 |
| 5     | 469                          | -                                 |
| 6     | 58                           | -                                 |
| 7     | 393                          | -                                 |
| 8     | 431                          | -                                 |
| 9     | 6                            | -                                 |
| 10    | 14                           | -                                 |
| 11    | 132                          | -                                 |
| 12    | 244                          | 421                               |
| 13    | -                            | 145                               |
| 14    | -                            | 112                               |
| 15    | -                            | 1363                              |
| 16    | -                            | 449                               |
| 17    | -                            | 262                               |

bid, twice daily; qd, once daily

## Supplementary references

1. S. Ristic, S. Byiers, J. Foley, and D. Holmes, "Improved glycaemic control with dipeptidyl peptidase-4 inhibition in patients with type 2 diabetes: vildagliptin (LAF237) dose response," *Diabetes Obesity and Metabolism*, vol. 7, no. 6, pp. 692–698, 2005.
2. S. Dejager, S. Razac, J. E. Foley, and A. Schweizer, "Vildagliptin in drug-naïve patients with type 2 diabetes: a 24-week, double-blind, randomized, placebo-controlled, multiple-dose study," *Hormone and Metabolic Research*, vol. 39, no. 3, pp. 218–223, 2007.
3. W. A. Scherbaum, A. Schweizer, A. Mari et al., "Efficacy and tolerability of vildagliptin in drug-naïve patients with type 2 diabetes and mild hyperglycaemia\*," *Diabetes Obesity and Metabolism*, vol. 10, no. 8, pp. 675–682, 2008.
4. A. Schweizer, A. Couturier, J. E. Foley, and S. Dejager, "Comparison between vildagliptin and metformin to sustain reductions in HbA(1c) over 1 year in drug-naïve patients with Type 2 diabetes," *Diabetic Medicine*, vol. 24, no. 9, pp. 955–961, 2007.
5. J. E. Foley and S. Sreenan, "Efficacy and safety comparison between the DPP-4 inhibitor vildagliptin and the sulfonylurea gliclazide after two years of monotherapy in drug-naïve patients with type 2 diabetes," *Hormone and Metabolic Research*, vol. 41, no. 12, pp. 905–909, 2009.
6. H. Krum, V. Lukashevich, G. B. Bolli, P. Kozlovski, W. Kothny, and P. Ponikowski, "No significant difference in risk of heart failure hospitalization with vildagliptin in diabetic patients with systolic chronic heart failure: VIVID study," *Diabetes*, vol. 63, Supplement 1, pp. A743, 2014.

7. C. Pan, W. Yang, J. P. Barona et al., "Comparison of vildagliptin and acarbose monotherapy in patients with Type 2 diabetes: a 24-week, double-blind, randomized trial," *Diabetic Medicine*, vol. 25, no. 4, pp. 435–441, 2008.
8. J. Rosenstock, M. A. Baron, S. Dejager, D. Mills, and A. Schweizer, "Comparison of vildagliptin and rosiglitazone monotherapy in patients with type 2 diabetes: a 24-week, double-blind, randomized trial," *Diabetes Care*, vol. 30, no. 2, pp. 217–223, 2007.
9. W. D. Strain, V. Lukashevich, W. Kothny, M. J. Hoellinger, and P. M. Paldánus, "Individualised treatment targets for elderly patients with type 2 diabetes using vildagliptin add-on or lone therapy (INTERVAL): a 24 week, randomised, double-blind, placebo-controlled study," *Lancet*, vol.382, no. 9890, pp. 409-416, 2003.
10. J. E. Foley, M. C. Bunck, D. L. Möller-Goede et al., "Beta cell function following 1 year vildagliptin or placebo treatment and after 12 week washout in drug-naïve patients with type 2 diabetes and mild hyperglycaemia: a randomised controlled trial," *Diabetologia*, vol. 54, no. 8, pp. 1985–1991, 2011.
11. F. X. Pi-Sunyer, A. Schweizer, D. Mills, and S. Dejager, "Efficacy and tolerability of vildagliptin monotherapy in drug-naïve patients with type 2 diabetes," *Diabetes Research and Clinical Practice*, vol. 76, no. 1, pp. 132–138, 2007.
12. E. Bosi, F. Dotta, Y. Jia, and M. Goodman, "Vildagliptin plus metformin combination therapy provides superior glycaemic control to individual monotherapy in treatment-naïve patients with type 2 diabetes mellitus," *Diabetes Obesity and Metabolism*, vol. 11, no. 5, pp. 506–515, 2009.

13. E. Bosi, R. P. Camisasca, C. Collober, E. Rochotte, and A. J. Garber, "Effects of vildagliptin on glucose control over 24 weeks in patients with type 2 diabetes inadequately controlled with metformin," *Diabetes Care*, vol. 30, no. 4, pp. 890–895, 2007.
14. C. Pan, X. Xing, P. Han et al., "Efficacy and tolerability of vildagliptin as add-on therapy to metformin in Chinese patients with type 2 diabetes mellitus," *Diabetes Obesity and Metabolism*, vol. 14, no. 8, pp. 737–744, 2012.
15. E. Ferrannini, V. Fonseca, B. Zinman et al., "Fifty-two-week efficacy and safety of vildagliptin vs. glimepiride in patients with type 2 diabetes mellitus inadequately controlled on metformin monotherapy," *Diabetes Obesity and Metabolism*, vol. 11, no. 2, pp. 157–166, 2009.
16. C. Filozof and J. F. Gautier, "A comparison of efficacy and safety of vildagliptin and gliclazide in combination with metformin in patients with type 2 diabetes inadequately controlled with metformin alone: a 52-week, randomized study," *Diabetic Medicine*, vol. 27, no. 3, pp. 318–326, 2010.
17. G. Bolli, F. Dotta, L. Colin, B. Minic, and M. Goodman, "Comparison of vildagliptin and pioglitazone in patients with type 2 diabetes inadequately controlled with metformin," *Diabetes Obesity and Metabolism*, vol. 11, no. 6, pp. 589–595, 2009.
